# Supplementary material
Source: PubMed Central journal article supplement (PMC4114404)

**Online supplement Table 1s: Respiratory Adverse Events, Asthma (multiple symptoms) AEs, and Hospitalizations In the 5 Years Following BT**

|                             | Proportion of BT Subjects Experiencing One or More Events (%) |                                                        |                                           | Event Rates (Events/Subject/Year)       |                                                        |                                           |
|-----------------------------|---------------------------------------------------------------|--------------------------------------------------------|-------------------------------------------|-----------------------------------------|--------------------------------------------------------|-------------------------------------------|
|                             | Respiratory Adverse Events <sup>1</sup>                       | Asthma (multiple symptoms) Adverse Events <sup>2</sup> | Hospitalizations for Respiratory Symptoms | Respiratory Adverse Events <sup>1</sup> | Asthma (multiple symptoms) Adverse Events <sup>2</sup> | Hospitalizations for Respiratory Symptoms |
| 12 Months before BT (n=190) | NA*                                                           | NA*                                                    | 4.2<br>[1.4, 7.1]                         | NA*                                     | NA*                                                    | 0.053<br>[0.04, 0.08]                     |
| Year 1 (n=181)              | 72.9<br>[66.5, 79.4]                                          | 28.7<br>[22.1, 35.3]                                   | 3.3<br>[0.7, 5.9]                         | 2.02<br>[1.764, 2.318]                  | 0.481<br>[0.379, 0.609]                                | 0.04<br>[0.025, 0.060]                    |
| Year 2 (n=165)              | 58.8<br>[51.3, 66.3]                                          | 27.9<br>[21.0, 34.7]                                   | 4.2<br>[1.2, 7.3]                         | 1.22<br>[1.013, 1.465]                  | 0.461<br>[0.357, 0.594]                                | 0.061<br>[0.042, 0.087]                   |
| Year 3 (n=162)              | 58.0<br>[50.4, 65.6]                                          | 29.6<br>[22.6, 36.7]                                   | 6.2<br>[2.5, 9.9]                         | 1.25<br>[1.037, 1.499]                  | 0.506<br>[0.396, 0.646]                                | 0.068<br>[0.048, 0.096]                   |
| Year 4 (n=159)              | 54.7<br>[47.0, 62.5]                                          | 31.4<br>[24.2, 38.7]                                   | 5.7<br>[2.1, 9.3]                         | 1.18<br>[0.971, 1.424]                  | 0.503<br>[0.393, 0.644]                                | 0.076<br>[0.054, 0.105]                   |
| Year 5 (n=162)              | 47.5<br>[39.8, 55.2]                                          | 24.7<br>[18.1, 31.3]                                   | 1.9<br>[0.0, 3.9]                         | 0.78<br>[0.616, 0.982]                  | 0.321<br>[0.236, 0.436]                                | 0.025<br>[0.014, 0.044]                   |
| <b>Average over 5 years</b> | <b>58.7</b><br><b>[53.4, 63.8]</b>                            | <b>28.4</b><br><b>[23.7, 33.6]</b>                     | <b>3.9</b><br><b>[2.3, 6.6]</b>           | <b>1.30</b><br><b>[1.149, 1.481]</b>    | <b>0.45</b><br><b>[0.374, 0.554]</b>                   | <b>0.053</b><br><b>[0.038, 0.073]</b>     |

Values are point estimates and [95% CI]. Year 1 is 365 days after the treatment period (365 days after 6 weeks after last bronchoscopy).

\*: Adverse events were not collected for the 12 month period before BT.

<sup>1</sup>: Respiratory adverse events are any and all events related to the respiratory system.

<sup>2</sup>: Asthma (multiple symptoms) adverse events represent two or more asthma symptoms such as wheeze, cough, dyspnea, mucus production etc. occurring at the same time.

There were a total of 44 respiratory hospitalizations over 5 years in 23 subjects (7 hospitalizations in 6 subjects in Year 1, 10 hospitalizations in 7 subjects in Year 2, 11 hospitalizations in 10 subjects in Year 3, 12 hospitalizations in 9 subjects in Year 4, and 4 hospitalizations in 3 subjects in Year 5). Three subjects accounted for 20 of the 44 total hospitalizations (45.5%) spread out over 5 years.

---

---

ACCEPTED MANUSCRIPT

**Online supplement Table 2s: Event Rates: Responders versus Non-Responders  
(Events/Subject/Year)**

|                                                   | Event Rates (Events/Subject/Year) |        |        |        |       |                     |
|---------------------------------------------------|-----------------------------------|--------|--------|--------|-------|---------------------|
|                                                   | Year 1                            | Year 2 | Year 3 | Year 4 | Year5 | Mean Year2 to Year5 |
| <b>Severe Exacerbations</b>                       |                                   |        |        |        |       |                     |
| Responders                                        | 0.425                             | 0.288  | 0.458  | 0.504  | 0.313 | 0.389               |
| Non-Responders                                    | 0.743                             | 0.879  | 0.936  | 0.800  | 0.290 | 0.720               |
| <b>Respiratory AEs<sup>1</sup></b>                |                                   |        |        |        |       |                     |
| Responders                                        | 1.849                             | 1.061  | 1.176  | 1.001  | 0.718 | 1.012               |
| Non-Responders                                    | 2.743                             | 1.849  | 1.548  | 1.500  | 1.032 | 1.487               |
| <b>Asthma (Multiple Symptoms) AEs<sup>2</sup></b> |                                   |        |        |        |       |                     |
| Responders                                        | 0.397                             | 0.364  | 0.420  | 0.434  | 0.282 | 0.376               |
| Non-Responders                                    | 0.829                             | 0.849  | 0.871  | 0.800  | 0.484 | 0.745               |
| <b>ER Visits for Respiratory Symptoms</b>         |                                   |        |        |        |       |                     |
| Responders                                        | 0.062                             | 0.038  | 0.107  | 0.070  | 0.061 | 0.068               |
| Non-Responders                                    | 0.114                             | 0.273  | 0.258  | 0.200  | 0.097 | 0.214               |
| <b>Hospitalizations for Respiratory Symptoms</b>  |                                   |        |        |        |       |                     |
| Responders                                        | 0.021                             | 0.046  | 0.061  | 0.085  | 0.015 | 0.051               |
| Non-Responders                                    | 0.114                             | 0.121  | 0.097  | 0.033  | 0.065 | 0.079               |

Responders: Subjects with AQLQ score change from Baseline to Year 1 of  $\geq 0.5$   
(n Year 1 =146; n Year 2 =132, n Year 3 =131, n Year 4 =129, n Year 5=131).

Non-Responders: Subjects with AQLQ score change from Baseline to Year 1 of  $< 0.5$   
(n Year 1 =35; n Year 2 =33, n Year 3 =31, n Year 4 =30, n Year 5=31).

<sup>1</sup>: Respiratory adverse events are any and all events related to the respiratory system.

<sup>2</sup>: Asthma (multiple symptoms) adverse events represent two or more asthma symptoms such as wheeze, cough, dyspnea, mucus production etc. occurring at the same time.

**Online Supplement Figure 1**

**Legend for Online Supplement Figure 1:** Annualized severe exacerbation rates (top panel) and emergency room visit rates (bottom panel) in the AIR2 Trial over the 5 year evaluation periods. The data for Year 1 in these figures for both the Sham (white bars) and BT groups (blue bars) are standardized to 52 weeks. The solid bars in both graphs represent the Post-Treatment Period, and the hashed bars represent the Treatment Period.

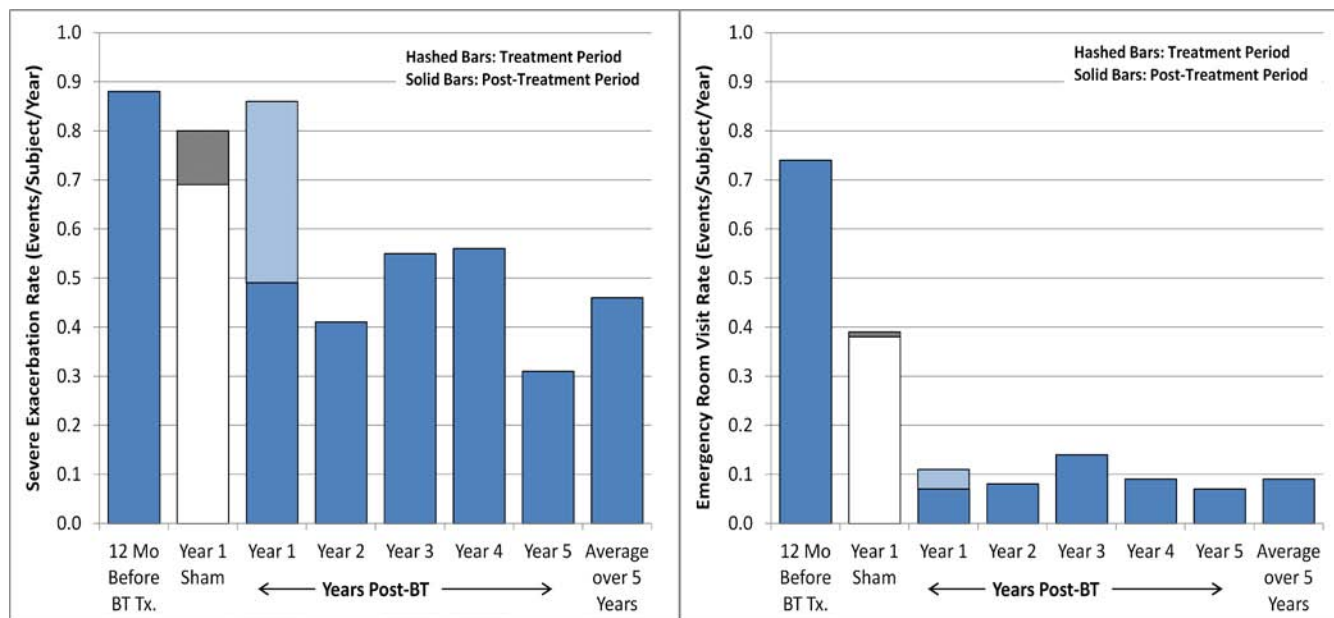

Supplement: NIHMS542587-supplement-supplement_1.pdf [file NIHMS542587-supplement-supplement_1.pdf]
